# Supplementary material
Source: PubMed Central journal article supplement (PMC3125133)
Supplement: NIHMS305530-supplement-supp__info.pdf [file NIHMS305530-supplement-supp__info.pdf]

# Supporting Information

## Journal of Medicinal Chemistry

### Structural Simplification of Bioactive Natural Products with Multicomponent Synthesis. 2. Antiproliferative and Antitubulin Activities of Pyrano[3,2-c]pyridones and Pyrano[3,2-c]quinolones

Igor V. Magedov,\* Madhuri Manpadi, Marcia A. Ogasawara, Adriana S. Dhawan, Snezna Rogelj, Severine Van slambrouck, Wim F. A. Steelant, Nikolai M. Evdokimov, Pavel Y. Uglinskii, Eerik M. Elias, Erica J. Knee, Paul Tongwa, Mikhail Yu. Antipin, and Alexander Kornienko\*

*Contribution from the Department of Organic Chemistry, Timiryazev Agriculture Academy, Moscow 127550, Russia, Department of Chemistry, New Mexico Institute of Mining and Technology, Socorro, New Mexico 87801, USA, Department of Natural Sciences, New Mexico Highlands University, Las Vegas, New Mexico 87701, USA, Institute of Organoelement Compounds, Russian Academy of Sciences, Moscow, Russia, Intelbioscan Ltd., Timiryazevsky Proesd 2, Moscow 127550, Russia*

imagedov@gmail.com, akornien@nmt.edu

#### X-ray structure determination.

Details of the crystal data, data collection and structure refinement parameters for compound **15** are presented in Table 1. Single crystal X-ray diffraction experiment was carried out with a Bruker SMART APEX II diffractometer, with CCD area detector at 250K. Semiempirical method SADABS<sub>1</sub> was applied for absorption correction. The structure was solved by direct methods and refined by the full-matrix least-squares technique against  $F^2$  with the anisotropic temperature parameters for all non-hydrogen atoms. Data reduction and further calculations were performed using Bruker SAINT+<sub>2</sub> and SHELXTL NT<sub>3</sub> program packages.

#### References

1. Sheldrick G.M. SADABS v.2.03, Bruker/Siemens Area Detector Absorption Correction Program, (2003) Bruker AXS, Madison, Wisconsin, USA.
2. SAINTP+ for NT. Data Reduction and Correction Program v. 6.2, (2001) Bruker AXS, Madison, Wisconsin, USA.
3. Sheldrick G.M. SHELXTL NT v. 6.12, Structure Determination Software Suite, (2001) Bruker AXS, Madison, Wisconsin, USA.

Table 1. Crystal data and structure refinement for **15**.

|                                   |                                                                               |                 |
|-----------------------------------|-------------------------------------------------------------------------------|-----------------|
| Identification code               | paul6a                                                                        |                 |
| Empirical formula                 | C <sub>19</sub> H <sub>19</sub> Cl <sub>2</sub> N <sub>3</sub> O <sub>3</sub> |                 |
| Formula weight                    | 408.27                                                                        |                 |
| Temperature                       | 100(2) K                                                                      |                 |
| Wavelength                        | 0.71073 Å                                                                     |                 |
| Crystal system                    | Triclinic                                                                     |                 |
| Space group                       | P -1                                                                          |                 |
| Unit cell dimensions              | a = 9.120(6) Å                                                                | α = 71.757(8)°. |
|                                   | b = 10.251(6) Å                                                               | β = 74.660(9)°. |
|                                   | c = 11.299(7) Å                                                               | γ = 80.836(9)°. |
| Volume                            | 964.1(10) Å <sup>3</sup>                                                      |                 |
| Z                                 | 2                                                                             |                 |
| Density (calculated)              | 1.406 Mg/m <sup>3</sup>                                                       |                 |
| Absorption coefficient            | 0.362 mm <sup>-1</sup>                                                        |                 |
| F(000)                            | 424                                                                           |                 |
| Crystal size                      | 0.30 x 0.30 x 0.20 mm <sup>3</sup>                                            |                 |
| Theta range for data collection   | 2.10 to 27.87°.                                                               |                 |
| Index ranges                      | -11 ≤ h ≤ 11, -13 ≤ k ≤ 13, -14 ≤ l ≤ 14                                      |                 |
| Reflections collected             | 12392                                                                         |                 |
| Independent reflections           | 4524 [R(int) = 0.0939]                                                        |                 |
| Completeness to theta = 27.87°    | 98.2 %                                                                        |                 |
| Absorption correction             | Semi-empirical from equivalents                                               |                 |
| Max. and min. transmission        | 0.9312 and 0.8993                                                             |                 |
| Refinement method                 | Full-matrix least-squares on F <sup>2</sup>                                   |                 |
| Data / restraints / parameters    | 4524 / 0 / 247                                                                |                 |
| Goodness-of-fit on F <sup>2</sup> | 1.006                                                                         |                 |
| Final R indices [I > 2σ(I)]       | R1 = 0.0549, wR2 = 0.0932                                                     |                 |
| R indices (all data)              | R1 = 0.1419, wR2 = 0.1139                                                     |                 |
| Largest diff. peak and hole       | 0.274 and -0.284 e.Å <sup>-3</sup>                                            |                 |

Table 2. Atomic coordinates ( $\times 10^4$ ) and equivalent isotropic displacement parameters ( $\text{\AA}^2 \times 10^3$ ) for **15**.  $U(\text{eq})$  is defined as one third of the trace of the orthogonalized  $U^{ij}$  tensor.

|       | x        | y        | z       | $U(\text{eq})$ |
|-------|----------|----------|---------|----------------|
| Cl(1) | 2268(1)  | 9248(1)  | 5098(1) | 47(1)          |
| Cl(2) | 4201(1)  | 7207(1)  | 3555(1) | 47(1)          |
| O(1)  | -1243(2) | 10785(2) | 1136(2) | 32(1)          |
| O(2)  | -302(2)  | 14890(2) | 1854(2) | 27(1)          |
| O(3)  | -283(3)  | 17973(2) | 2054(2) | 50(1)          |
| N(1)  | -3184(3) | 12034(2) | 2189(2) | 25(1)          |
| N(2)  | 1890(3)  | 15852(2) | 1299(2) | 29(1)          |
| N(3)  | 4754(3)  | 13630(2) | -251(2) | 32(1)          |
| C(1)  | 3251(3)  | 8719(3)  | 2785(3) | 30(1)          |
| C(2)  | 2413(3)  | 9611(3)  | 3471(3) | 26(1)          |
| C(3)  | 3357(3)  | 9044(3)  | 1490(3) | 33(1)          |
| C(4)  | 1672(3)  | 10831(3) | 2839(3) | 24(1)          |
| C(5)  | 2609(3)  | 10256(3) | 873(3)  | 29(1)          |
| C(6)  | 1773(3)  | 11166(3) | 1532(3) | 22(1)          |
| C(7)  | 1029(3)  | 12527(3) | 842(3)  | 23(1)          |
| C(8)  | -621(3)  | 12784(3) | 1472(3) | 23(1)          |
| C(9)  | -1660(3) | 11804(3) | 1565(3) | 23(1)          |
| C(10) | -4216(3) | 10994(3) | 2352(3) | 32(1)          |
| C(11) | -3730(3) | 13163(3) | 2630(3) | 26(1)          |
| C(12) | -5385(3) | 13324(3) | 3246(3) | 35(1)          |
| C(13) | -2746(3) | 14105(3) | 2492(3) | 25(1)          |
| C(14) | -1189(3) | 13880(3) | 1920(3) | 21(1)          |
| C(15) | 1225(3)  | 14786(3) | 1280(3) | 24(1)          |
| C(16) | 1880(3)  | 13730(3) | 777(3)  | 22(1)          |
| C(17) | 3459(3)  | 13695(3) | 209(3)  | 24(1)          |
| C(18) | -1171(5) | 17785(5) | 3305(4) | 79(2)          |
| C(19) | -551(5)  | 16792(5) | 4272(4) | 89(2)          |

Table 3. Bond lengths [Å] and angles [°] for **15**.

---

|              |          |
|--------------|----------|
| Cl(1)-C(2)   | 1.730(3) |
| Cl(2)-C(1)   | 1.742(3) |
| O(1)-C(9)    | 1.251(3) |
| O(2)-C(15)   | 1.375(3) |
| O(2)-C(14)   | 1.385(3) |
| O(3)-C(18)   | 1.402(4) |
| O(3)-H(3A)   | 0.8999   |
| N(1)-C(11)   | 1.372(4) |
| N(1)-C(9)    | 1.402(4) |
| N(1)-C(10)   | 1.471(4) |
| N(2)-C(15)   | 1.339(4) |
| N(2)-H(2A)   | 0.8600   |
| N(2)-H(2B)   | 0.8601   |
| N(3)-C(17)   | 1.158(3) |
| C(1)-C(3)    | 1.376(4) |
| C(1)-C(2)    | 1.388(4) |
| C(2)-C(4)    | 1.399(4) |
| C(3)-C(5)    | 1.390(4) |
| C(3)-H(3)    | 0.9500   |
| C(4)-C(6)    | 1.389(4) |
| C(4)-H(4)    | 0.9500   |
| C(5)-C(6)    | 1.383(4) |
| C(5)-H(5)    | 0.9500   |
| C(6)-C(7)    | 1.521(4) |
| C(7)-C(8)    | 1.505(4) |
| C(7)-C(16)   | 1.531(4) |
| C(7)-H(7)    | 1.0000   |
| C(8)-C(14)   | 1.348(4) |
| C(8)-C(9)    | 1.450(4) |
| C(10)-H(10A) | 0.9800   |
| C(10)-H(10B) | 0.9800   |
| C(10)-H(10C) | 0.9800   |
| C(11)-C(13)  | 1.368(4) |
| C(11)-C(12)  | 1.492(4) |

|                  |          |
|------------------|----------|
| C(12)-H(12A)     | 0.9800   |
| C(12)-H(12B)     | 0.9800   |
| C(12)-H(12C)     | 0.9800   |
| C(13)-C(14)      | 1.411(4) |
| C(13)-H(13)      | 0.9500   |
| C(15)-C(16)      | 1.361(4) |
| C(16)-C(17)      | 1.413(4) |
| C(18)-C(19)      | 1.413(5) |
| C(18)-H(18A)     | 0.9900   |
| C(18)-H(18B)     | 0.9900   |
| C(19)-H(19A)     | 0.9800   |
| C(19)-H(19B)     | 0.9800   |
| C(19)-H(19C)     | 0.9800   |
|                  |          |
| C(15)-O(2)-C(14) | 118.4(2) |
| C(18)-O(3)-H(3A) | 110.3    |
| C(11)-N(1)-C(9)  | 123.4(3) |
| C(11)-N(1)-C(10) | 120.0(2) |
| C(9)-N(1)-C(10)  | 116.6(2) |
| C(15)-N(2)-H(2A) | 122.6    |
| C(15)-N(2)-H(2B) | 118.8    |
| H(2A)-N(2)-H(2B) | 118.5    |
| C(3)-C(1)-C(2)   | 119.9(3) |
| C(3)-C(1)-Cl(2)  | 119.9(2) |
| C(2)-C(1)-Cl(2)  | 120.2(3) |
| C(1)-C(2)-C(4)   | 119.7(3) |
| C(1)-C(2)-Cl(1)  | 121.3(2) |
| C(4)-C(2)-Cl(1)  | 119.0(2) |
| C(1)-C(3)-C(5)   | 119.9(3) |
| C(1)-C(3)-H(3)   | 120.0    |
| C(5)-C(3)-H(3)   | 120.0    |
| C(6)-C(4)-C(2)   | 120.7(3) |
| C(6)-C(4)-H(4)   | 119.6    |
| C(2)-C(4)-H(4)   | 119.6    |
| C(6)-C(5)-C(3)   | 121.4(3) |
| C(6)-C(5)-H(5)   | 119.3    |

|                     |          |
|---------------------|----------|
| C(3)-C(5)-H(5)      | 119.3    |
| C(5)-C(6)-C(4)      | 118.4(3) |
| C(5)-C(6)-C(7)      | 121.2(3) |
| C(4)-C(6)-C(7)      | 120.4(2) |
| C(8)-C(7)-C(6)      | 113.2(2) |
| C(8)-C(7)-C(16)     | 108.1(2) |
| C(6)-C(7)-C(16)     | 110.4(2) |
| C(8)-C(7)-H(7)      | 108.4    |
| C(6)-C(7)-H(7)      | 108.4    |
| C(16)-C(7)-H(7)     | 108.4    |
| C(14)-C(8)-C(9)     | 118.6(3) |
| C(14)-C(8)-C(7)     | 124.1(3) |
| C(9)-C(8)-C(7)      | 117.3(3) |
| O(1)-C(9)-N(1)      | 120.4(3) |
| O(1)-C(9)-C(8)      | 123.0(3) |
| N(1)-C(9)-C(8)      | 116.6(3) |
| N(1)-C(10)-H(10A)   | 109.5    |
| N(1)-C(10)-H(10B)   | 109.5    |
| H(10A)-C(10)-H(10B) | 109.5    |
| N(1)-C(10)-H(10C)   | 109.5    |
| H(10A)-C(10)-H(10C) | 109.5    |
| H(10B)-C(10)-H(10C) | 109.5    |
| C(13)-C(11)-N(1)    | 119.1(3) |
| C(13)-C(11)-C(12)   | 122.1(3) |
| N(1)-C(11)-C(12)    | 118.8(3) |
| C(11)-C(12)-H(12A)  | 109.5    |
| C(11)-C(12)-H(12B)  | 109.5    |
| H(12A)-C(12)-H(12B) | 109.5    |
| C(11)-C(12)-H(12C)  | 109.5    |
| H(12A)-C(12)-H(12C) | 109.5    |
| H(12B)-C(12)-H(12C) | 109.5    |
| C(11)-C(13)-C(14)   | 119.2(3) |
| C(11)-C(13)-H(13)   | 120.4    |
| C(14)-C(13)-H(13)   | 120.4    |
| C(8)-C(14)-O(2)     | 123.2(3) |
| C(8)-C(14)-C(13)    | 122.9(3) |

|                     |          |
|---------------------|----------|
| O(2)-C(14)-C(13)    | 113.9(2) |
| N(2)-C(15)-C(16)    | 128.0(3) |
| N(2)-C(15)-O(2)     | 110.0(2) |
| C(16)-C(15)-O(2)    | 122.1(3) |
| C(15)-C(16)-C(17)   | 118.6(3) |
| C(15)-C(16)-C(7)    | 124.1(3) |
| C(17)-C(16)-C(7)    | 117.3(2) |
| N(3)-C(17)-C(16)    | 178.3(3) |
| O(3)-C(18)-C(19)    | 115.7(3) |
| O(3)-C(18)-H(18A)   | 108.4    |
| C(19)-C(18)-H(18A)  | 108.4    |
| O(3)-C(18)-H(18B)   | 108.4    |
| C(19)-C(18)-H(18B)  | 108.4    |
| H(18A)-C(18)-H(18B) | 107.4    |
| C(18)-C(19)-H(19A)  | 109.5    |
| C(18)-C(19)-H(19B)  | 109.5    |
| H(19A)-C(19)-H(19B) | 109.5    |
| C(18)-C(19)-H(19C)  | 109.5    |
| H(19A)-C(19)-H(19C) | 109.5    |
| H(19B)-C(19)-H(19C) | 109.5    |

---

Symmetry transformations used to generate equivalent atoms:

Table 4. Anisotropic displacement parameters ( $\text{\AA}^2 \times 10^3$ ) for paul61. The anisotropic displacement factor exponent takes the form:  $-2\pi^2 [ h^2 a^{*2} U^{11} + \dots + 2 h k a^* b^* U^{12} ]$

|       | $U^{11}$ | $U^{22}$ | $U^{33}$ | $U^{23}$ | $U^{13}$ | $U^{12}$ |
|-------|----------|----------|----------|----------|----------|----------|
| Cl(1) | 50(1)    | 49(1)    | 31(1)    | -3(1)    | -10(1)   | 15(1)    |
| Cl(2) | 45(1)    | 28(1)    | 63(1)    | -10(1)   | -21(1)   | 15(1)    |
| O(1)  | 28(1)    | 26(1)    | 48(1)    | -17(1)   | -12(1)   | 0(1)     |
| O(2)  | 16(1)    | 26(1)    | 38(1)    | -12(1)   | -2(1)    | -1(1)    |
| O(3)  | 58(2)    | 30(1)    | 48(2)    | -9(1)    | -1(1)    | 10(1)    |
| N(1)  | 20(1)    | 25(1)    | 31(2)    | -7(1)    | -9(1)    | -2(1)    |
| N(2)  | 18(1)    | 28(2)    | 41(2)    | -17(1)   | -1(1)    | 0(1)     |
| N(3)  | 21(2)    | 23(2)    | 47(2)    | -13(1)   | 1(1)     | 2(1)     |
| C(1)  | 20(2)    | 21(2)    | 47(2)    | -7(2)    | -10(1)   | 1(1)     |
| C(2)  | 23(2)    | 25(2)    | 29(2)    | -8(1)    | -3(1)    | -1(1)    |
| C(3)  | 24(2)    | 30(2)    | 50(2)    | -24(2)   | -10(2)   | 6(1)     |
| C(4)  | 20(2)    | 23(2)    | 25(2)    | -8(1)    | 0(1)     | 2(1)     |
| C(5)  | 28(2)    | 30(2)    | 29(2)    | -12(1)   | -7(1)    | 5(1)     |
| C(6)  | 18(2)    | 17(2)    | 31(2)    | -6(1)    | -4(1)    | -3(1)    |
| C(7)  | 21(2)    | 22(2)    | 25(2)    | -5(1)    | -4(1)    | -2(1)    |
| C(8)  | 21(2)    | 21(2)    | 28(2)    | -5(1)    | -9(1)    | -1(1)    |
| C(9)  | 16(2)    | 23(2)    | 31(2)    | -7(1)    | -7(1)    | 1(1)     |
| C(10) | 19(2)    | 32(2)    | 45(2)    | -13(2)   | -5(1)    | -5(1)    |
| C(11) | 20(2)    | 29(2)    | 30(2)    | -10(1)   | -6(1)    | 2(1)     |
| C(12) | 21(2)    | 34(2)    | 48(2)    | -13(2)   | -5(2)    | -1(1)    |
| C(13) | 23(2)    | 22(2)    | 31(2)    | -8(1)    | -6(1)    | 2(1)     |
| C(14) | 20(2)    | 18(2)    | 25(2)    | -3(1)    | -7(1)    | -2(1)    |
| C(15) | 20(2)    | 26(2)    | 25(2)    | -4(1)    | -4(1)    | -2(1)    |
| C(16) | 17(2)    | 18(2)    | 29(2)    | -5(1)    | -6(1)    | 2(1)     |
| C(17) | 28(2)    | 16(2)    | 29(2)    | -9(1)    | -6(1)    | 1(1)     |
| C(18) | 52(3)    | 104(4)   | 60(3)    | -27(3)   | 5(2)     | 33(3)    |
| C(19) | 63(3)    | 113(4)   | 55(3)    | 2(3)     | 0(2)     | 16(3)    |



Table 5. Hydrogen coordinates ( $\times 10^4$ ) and isotropic displacement parameters ( $\text{\AA}^2 \times 10^3$ ) for **15**.

|        | x     | y     | z    | U(eq) |
|--------|-------|-------|------|-------|
| H(3A)  | -529  | 18810 | 1552 | 60    |
| H(2A)  | 2833  | 15980 | 938  | 34    |
| H(2B)  | 1342  | 16460 | 1643 | 34    |
| H(3)   | 3939  | 8440  | 1017 | 39    |
| H(4)   | 1092  | 11438 | 3310 | 29    |
| H(5)   | 2675  | 10464 | -18  | 35    |
| H(7)   | 1091  | 12518 | -52  | 28    |
| H(10A) | -3630 | 10225 | 2052 | 47    |
| H(10B) | -4990 | 11409 | 1854 | 47    |
| H(10C) | -4717 | 10654 | 3260 | 47    |
| H(12A) | -5644 | 12531 | 3998 | 52    |
| H(12B) | -5994 | 13373 | 2634 | 52    |
| H(12C) | -5605 | 14172 | 3510 | 52    |
| H(13)  | -3106 | 14901 | 2778 | 31    |
| H(18A) | -2179 | 17516 | 3338 | 95    |
| H(18B) | -1342 | 18680 | 3502 | 95    |
| H(19A) | 259   | 17177 | 4446 | 133   |
| H(19B) | -128  | 15972 | 3986 | 133   |
| H(19C) | -1355 | 16537 | 5054 | 133   |

Table 6. Torsion angles [°] for **15**.

---

|                        |           |
|------------------------|-----------|
| C(3)-C(1)-C(2)-C(4)    | 0.5(4)    |
| Cl(2)-C(1)-C(2)-C(4)   | 179.1(2)  |
| C(3)-C(1)-C(2)-Cl(1)   | -179.4(2) |
| Cl(2)-C(1)-C(2)-Cl(1)  | -0.7(4)   |
| C(2)-C(1)-C(3)-C(5)    | -0.8(5)   |
| Cl(2)-C(1)-C(3)-C(5)   | -179.4(2) |
| C(1)-C(2)-C(4)-C(6)    | -0.5(4)   |
| Cl(1)-C(2)-C(4)-C(6)   | 179.4(2)  |
| C(1)-C(3)-C(5)-C(6)    | 1.1(5)    |
| C(3)-C(5)-C(6)-C(4)    | -1.1(4)   |
| C(3)-C(5)-C(6)-C(7)    | 176.6(3)  |
| C(2)-C(4)-C(6)-C(5)    | 0.8(4)    |
| C(2)-C(4)-C(6)-C(7)    | -177.0(3) |
| C(5)-C(6)-C(7)-C(8)    | 130.9(3)  |
| C(4)-C(6)-C(7)-C(8)    | -51.4(4)  |
| C(5)-C(6)-C(7)-C(16)   | -107.8(3) |
| C(4)-C(6)-C(7)-C(16)   | 69.9(3)   |
| C(6)-C(7)-C(8)-C(14)   | 120.8(3)  |
| C(16)-C(7)-C(8)-C(14)  | -1.8(4)   |
| C(6)-C(7)-C(8)-C(9)    | -61.0(3)  |
| C(16)-C(7)-C(8)-C(9)   | 176.5(2)  |
| C(11)-N(1)-C(9)-O(1)   | -177.0(3) |
| C(10)-N(1)-C(9)-O(1)   | 2.6(4)    |
| C(11)-N(1)-C(9)-C(8)   | 4.0(4)    |
| C(10)-N(1)-C(9)-C(8)   | -176.4(2) |
| C(14)-C(8)-C(9)-O(1)   | 177.5(3)  |
| C(7)-C(8)-C(9)-O(1)    | -0.8(4)   |
| C(14)-C(8)-C(9)-N(1)   | -3.5(4)   |
| C(7)-C(8)-C(9)-N(1)    | 178.1(2)  |
| C(9)-N(1)-C(11)-C(13)  | -1.8(4)   |
| C(10)-N(1)-C(11)-C(13) | 178.7(3)  |
| C(9)-N(1)-C(11)-C(12)  | 178.2(2)  |
| C(10)-N(1)-C(11)-C(12) | -1.3(4)   |
| N(1)-C(11)-C(13)-C(14) | -1.1(4)   |

|                         |           |
|-------------------------|-----------|
| C(12)-C(11)-C(13)-C(14) | 178.9(3)  |
| C(9)-C(8)-C(14)-O(2)    | -178.7(2) |
| C(7)-C(8)-C(14)-O(2)    | -0.5(4)   |
| C(9)-C(8)-C(14)-C(13)   | 0.9(4)    |
| C(7)-C(8)-C(14)-C(13)   | 179.2(2)  |
| C(15)-O(2)-C(14)-C(8)   | 1.4(4)    |
| C(15)-O(2)-C(14)-C(13)  | -178.2(2) |
| C(11)-C(13)-C(14)-C(8)  | 1.5(4)    |
| C(11)-C(13)-C(14)-O(2)  | -178.9(2) |
| C(14)-O(2)-C(15)-N(2)   | 179.6(2)  |
| C(14)-O(2)-C(15)-C(16)  | 0.2(4)    |
| N(2)-C(15)-C(16)-C(17)  | 1.0(5)    |
| O(2)-C(15)-C(16)-C(17)  | -179.7(2) |
| N(2)-C(15)-C(16)-C(7)   | 177.9(3)  |
| O(2)-C(15)-C(16)-C(7)   | -2.8(4)   |
| C(8)-C(7)-C(16)-C(15)   | 3.3(4)    |
| C(6)-C(7)-C(16)-C(15)   | -120.9(3) |
| C(8)-C(7)-C(16)-C(17)   | -179.7(2) |
| C(6)-C(7)-C(16)-C(17)   | 56.0(3)   |

---

Symmetry transformations used to generate equivalent atoms:
